# Supplementary material for: Optimization and visualization of the edge weights in optimal assignment methods for virtual screening
Source: Springer Nature journal article supplement (doi:10.1186/1756-0381-6-7), 2013-03-26
Supplement: 13040_2012_85_MOESM9_ESM.pdf [file 13040_2012_85_MOESM9_ESM.pdf]

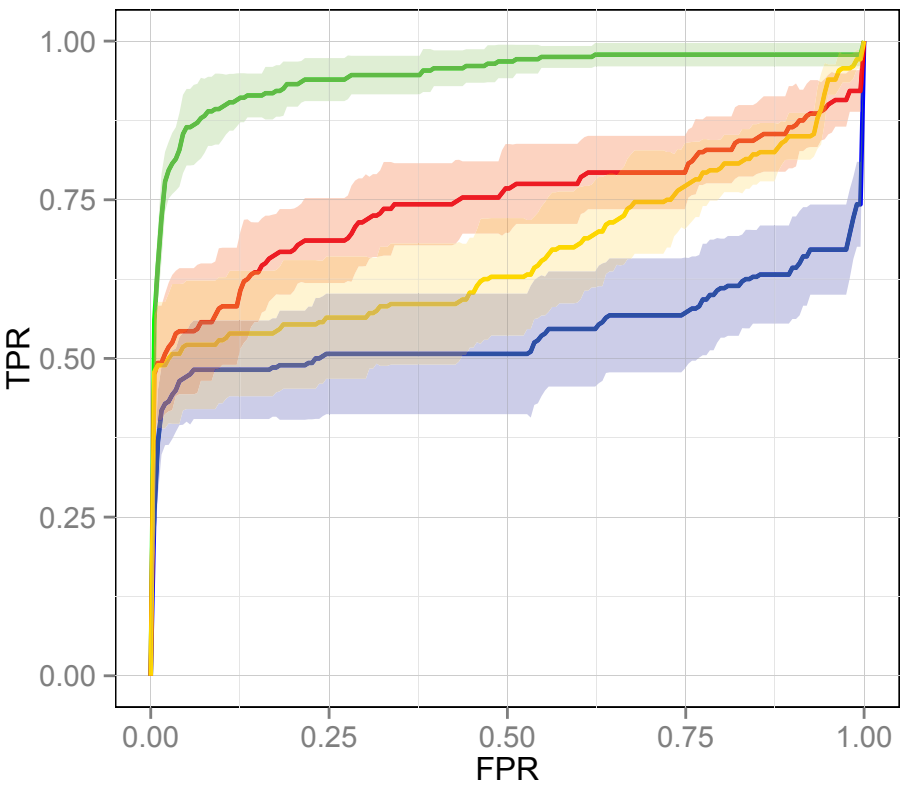

PSO-OA OA ECFP 4DFAP
